# Supplementary material for: A green and facile preparation approach, licochalcone A capped on hollow gold nanoparticles, for improving the solubility and dissolution of anticancer natural product
Source: PubMed Central journal article supplement (PMC5739669; doi:10.18632/oncotarget.22387), 2017-11-11
Supplement: oncotarget-08-105673-s001.pdf [file oncotarget-08-105673-s001.pdf]

# A green and facile preparation approach, licochalcone A capped on hollow gold nanoparticles, for improving the solubility and dissolution of anticancer natural product

## SUPPLEMENTARY MATERIALS

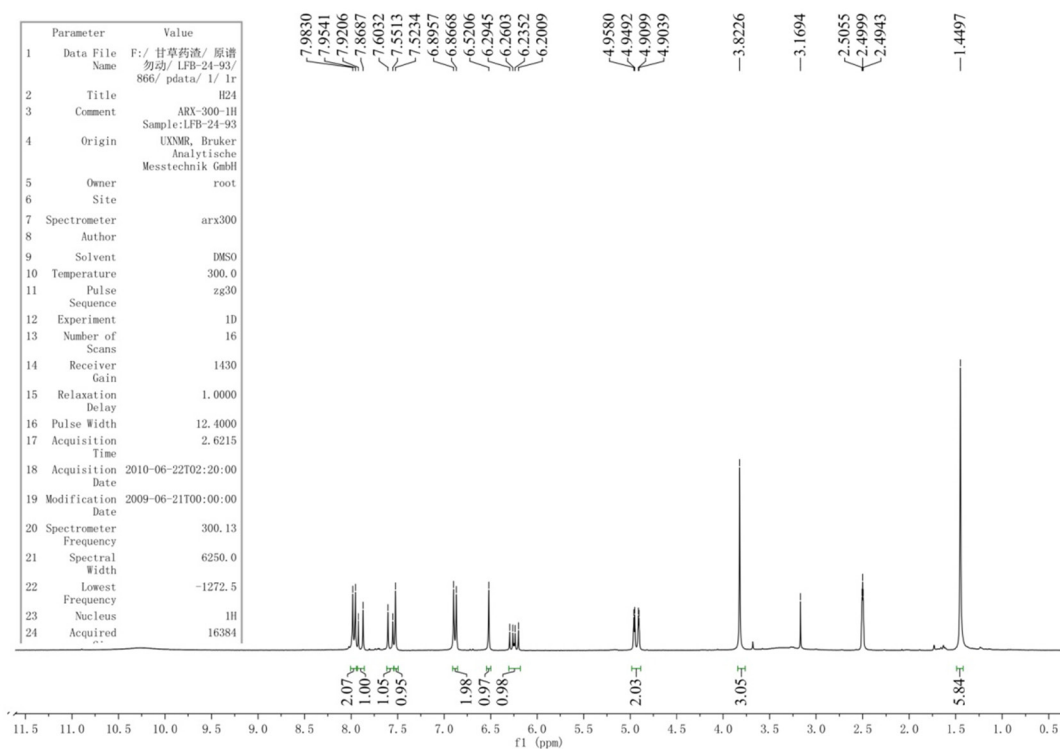

Supplementary Figure 1: <sup>1</sup>H-NMR Spectrum of licochalcone A.

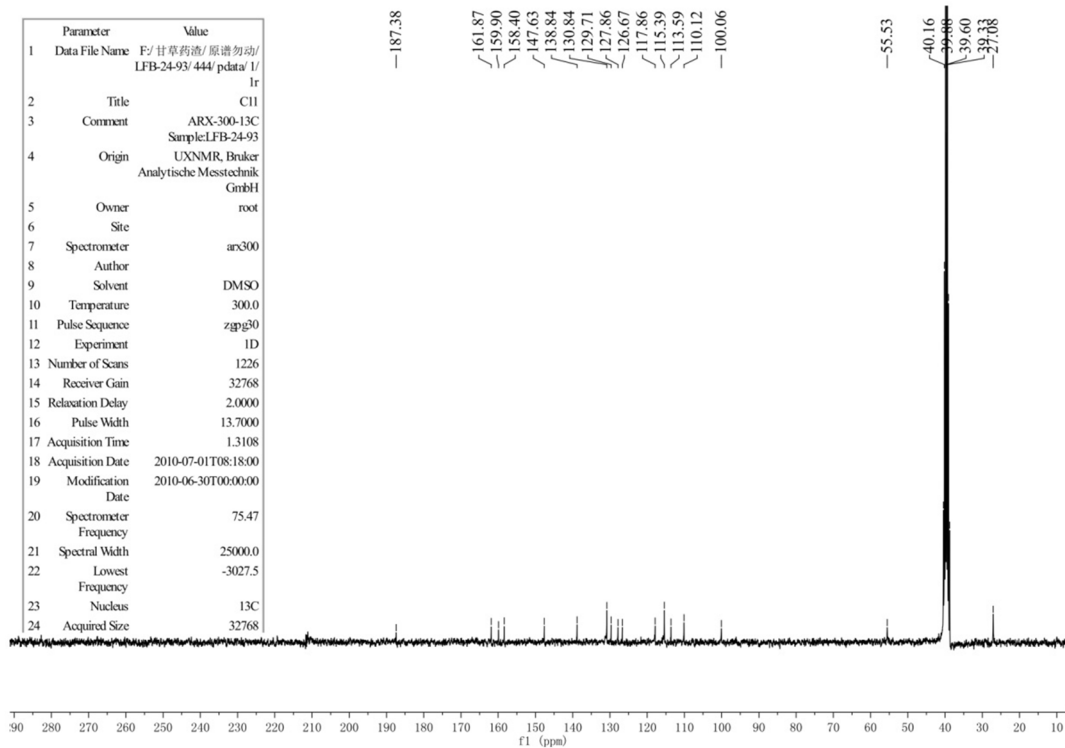

Supplementary Figure 2: <sup>13</sup>C-NMR Spectrum of licochalcone A.
